# Supplementary material for: Influencia de la retórica en la construcción del discurso científico en los trabajadores de investigación de pregrado
Source: Royal Society of Chemistry journal article supplement (doi:10.1039/d1cp05716b), 2012-01-01
Supplement: d1cp05716b1.pdf [file d1cp05716b1.pdf]

# Unraveling the multivalent Aluminium-ion redox mechanism in 3,4,9,10-Perylenetetracarboxylic dianhydride (PTCDA)

February 3, 2022

Nicolò Canever and Thomas Nann

## Supporting information

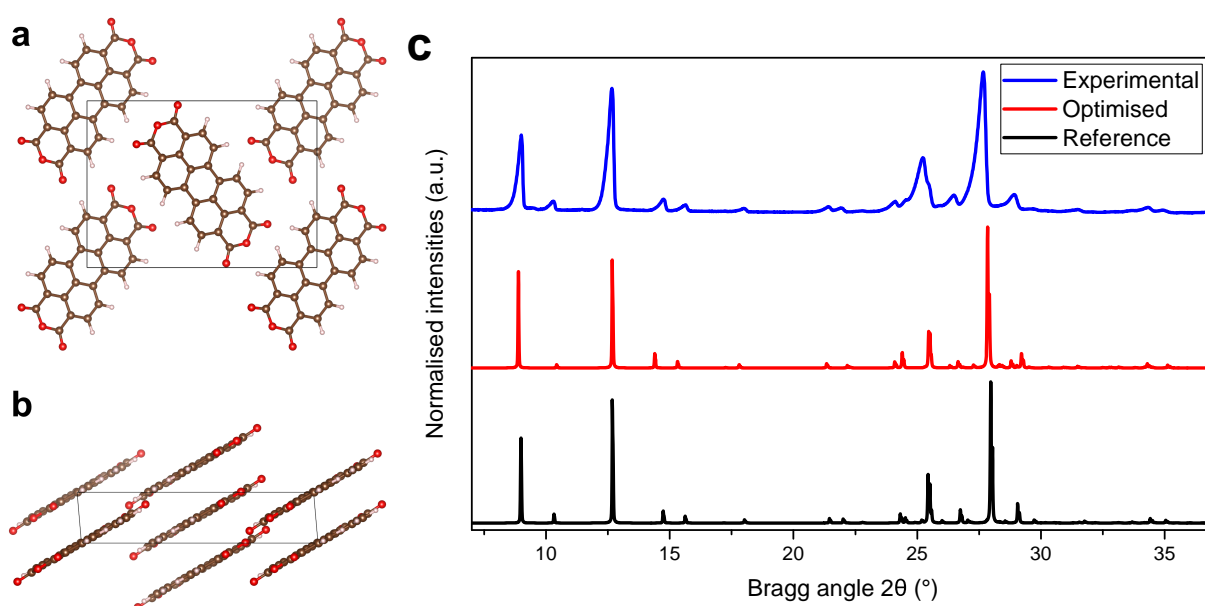

Figure S1: (a,b) Optimised geometry of the  $\alpha$ -PTCDA unit cell, projected along the  $a$  (top) and  $b$  (bottom) crystallographic axes (colour scheme: C = brown, H = white, O = red). The individual PTCDA molecules are arranged in the typical 'herringbone' configuration and the molecular planes are all parallel, which is consistent with the known structure of the  $\alpha$ -polymorph. (c) Comparison between the X-ray diffraction data predicted by the literature reference, [1] the relaxed structure calculated by Density Functional Theory (DFT), and the experimental powder diffraction data of the PTCDA sample used in this publication.

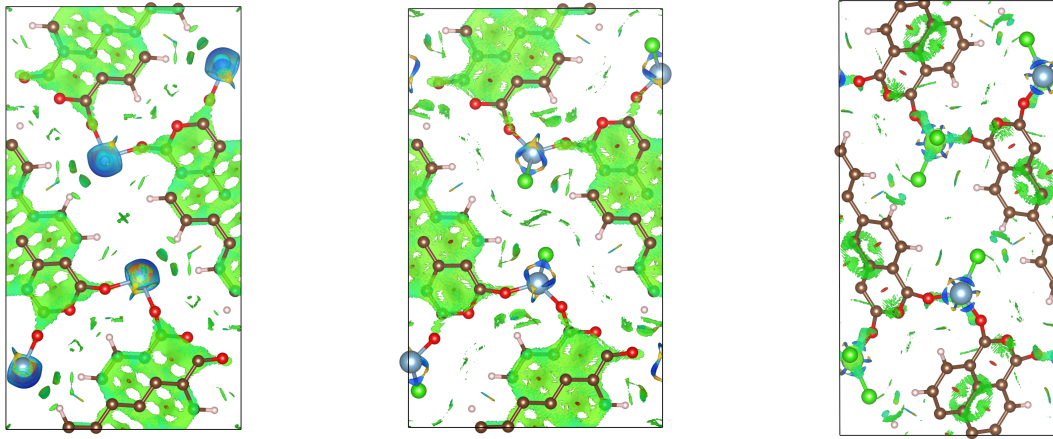

Figure S2: Visualisation of non-covalent interactions of PTCDA intercalated with  $\text{Al}^{3+}$  (left),  $\text{AlCl}_2^+$  (center),  $\text{AlCl}_2^+$  (right), using the method developed by Contreras-García *et al.*[2] The green regions overlapping the aromatic regions of the PTCDA molecules represent  $\pi$ - $\pi$ -stacking interactions in the lattice. It can be seen that the  $\text{AlCl}_2^+$ -intercalated structure presents the strongest interactions, as indicated by the fuller regions. On the other hand, the intermolecular interactions are greatly reduced in the case of  $\text{AlCl}_2^+$  intercalation. Isosurfaces value: 0.3.

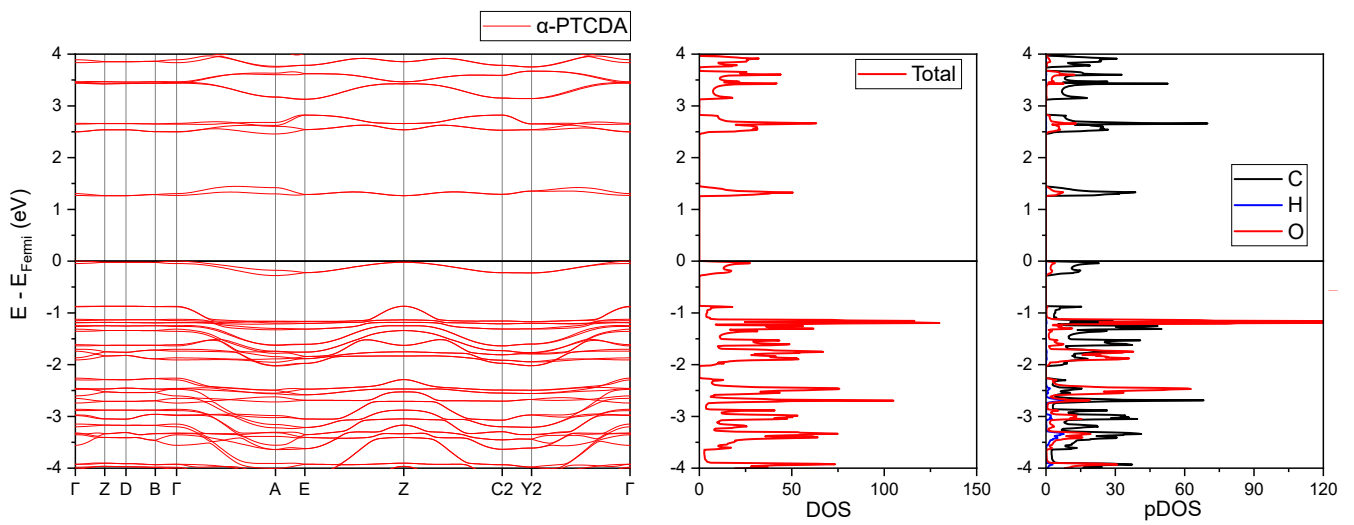

Figure S3: Band diagram, density of states (DOS) and projected density of states (pDOS) for the calculated structure of  $\alpha$ -PTCDA.

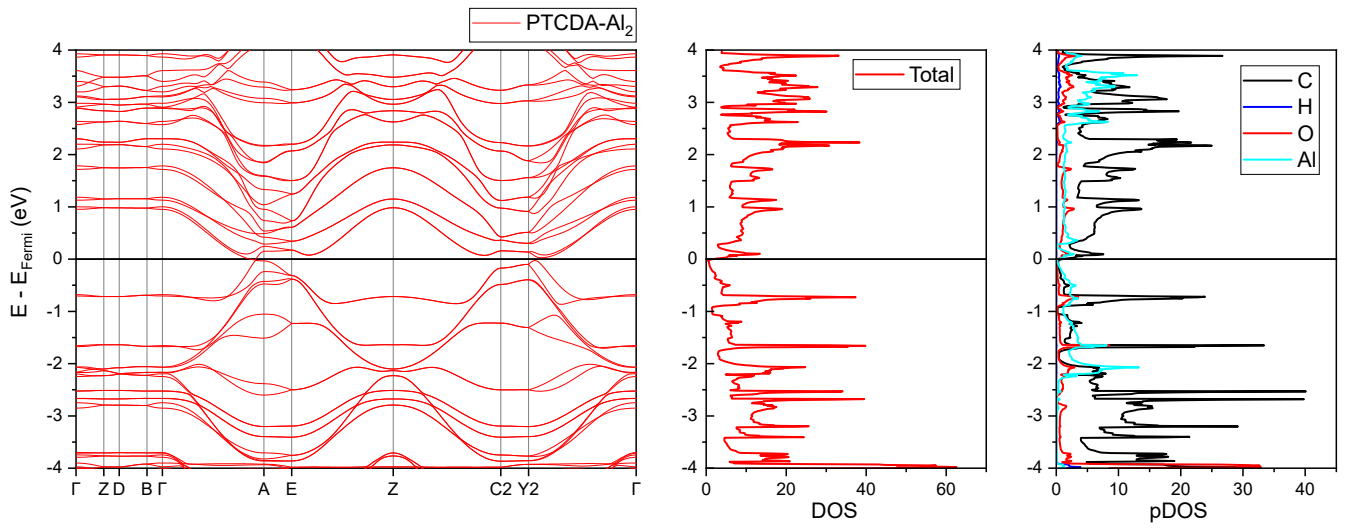

Figure S4: Band diagram, density of states (DOS) and projected density of states (pDOS) for the calculated structure of PTCDA- $\text{Al}_2$ .

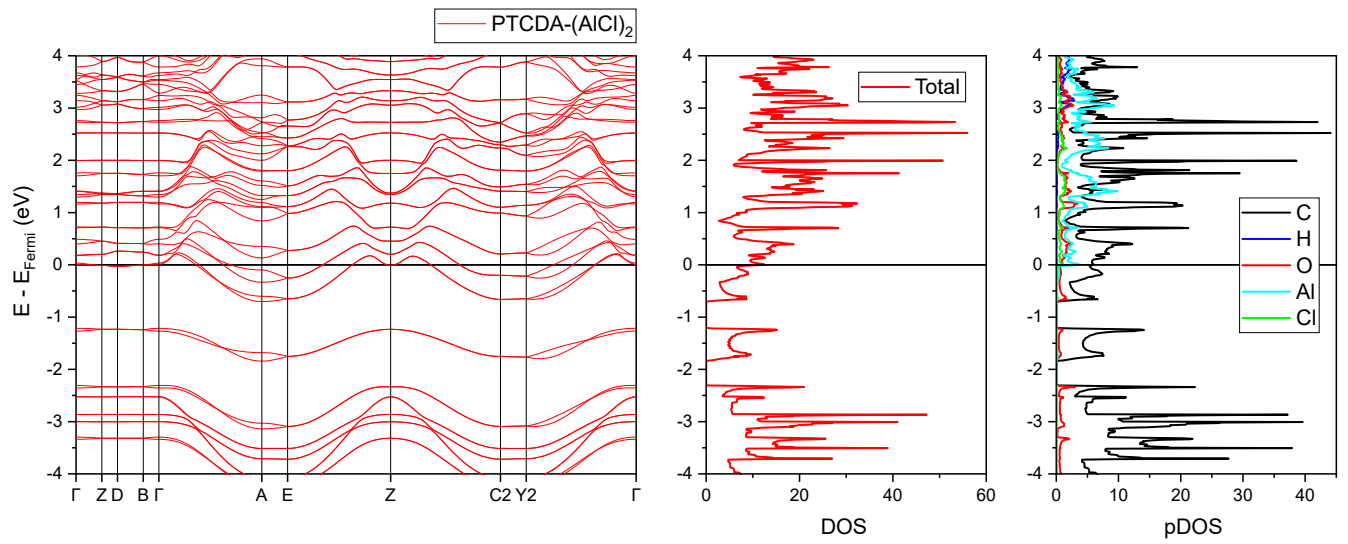

Figure S5: Band diagram, density of states (DOS) and projected density of states (pDOS) for the calculated structure of PTCDA- $(\text{AlCl})_2$ .

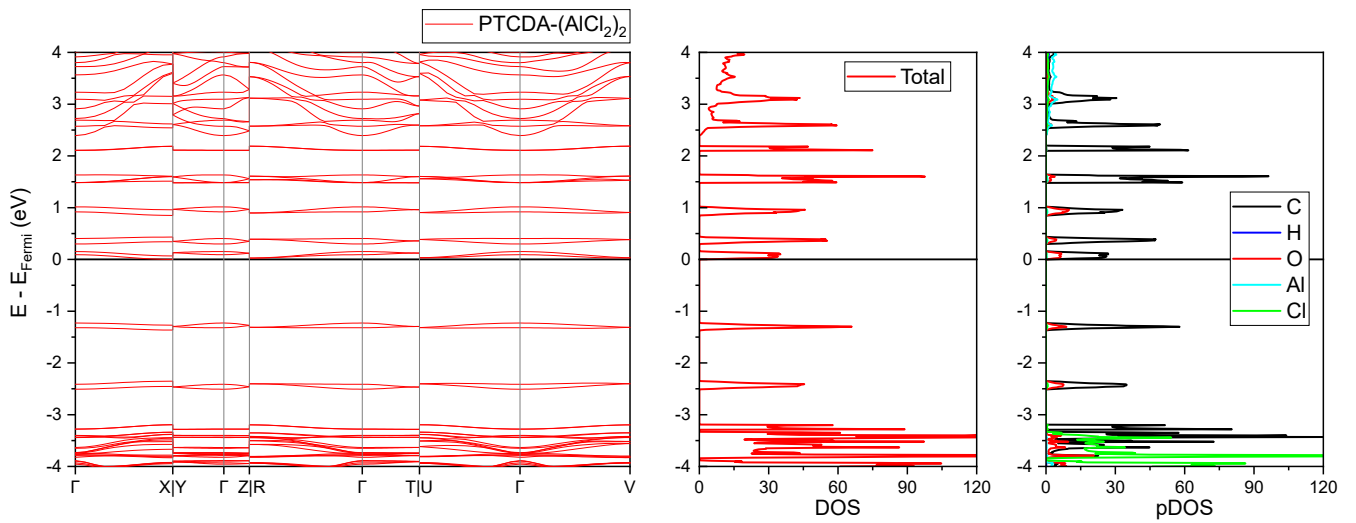

Figure S6: Band diagram, density of states (DOS) and projected density of states (pDOS) for the calculated structure of PTCDA- $(\text{AlCl}_2)_2$ .

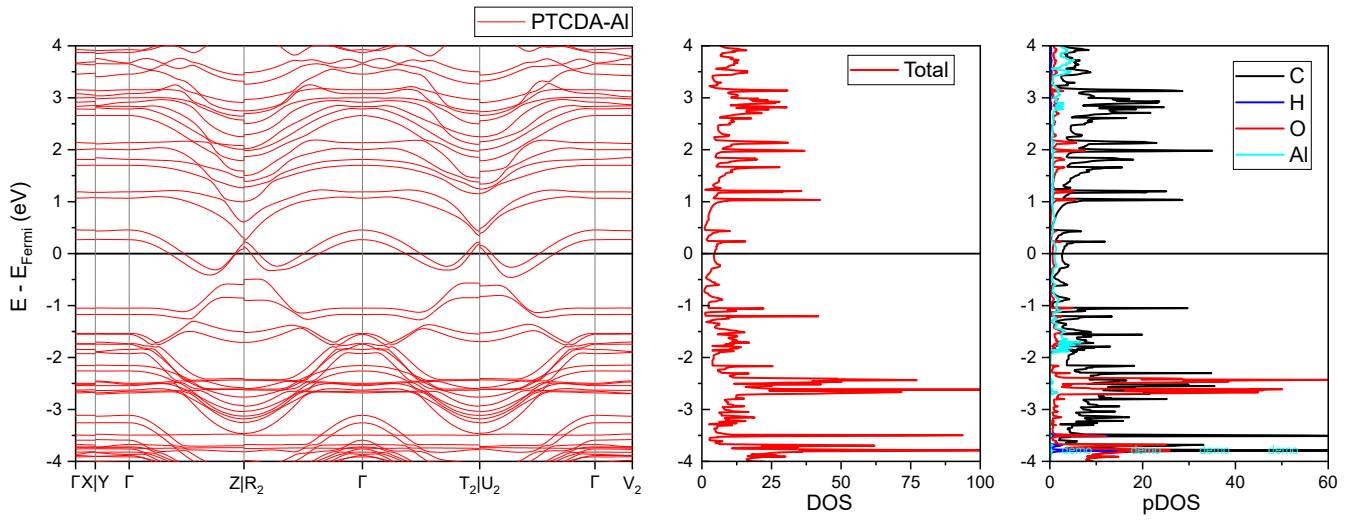

Figure S7: Band diagram, density of states (DOS) and projected density of states (pDOS) for the calculated structure of the partially intercalated structure PTCDA-Al.

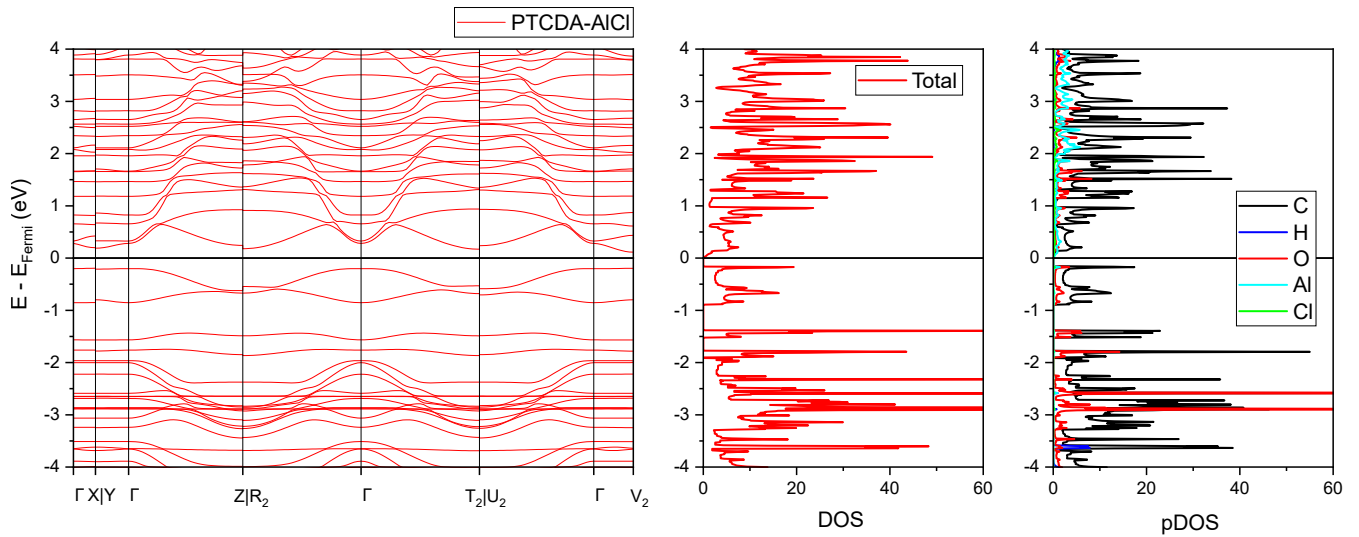

Figure S8: Band diagram, density of states (DOS) and projected density of states (pDOS) for the calculated structure of the partially intercalated structure PTCDA-AlCl.

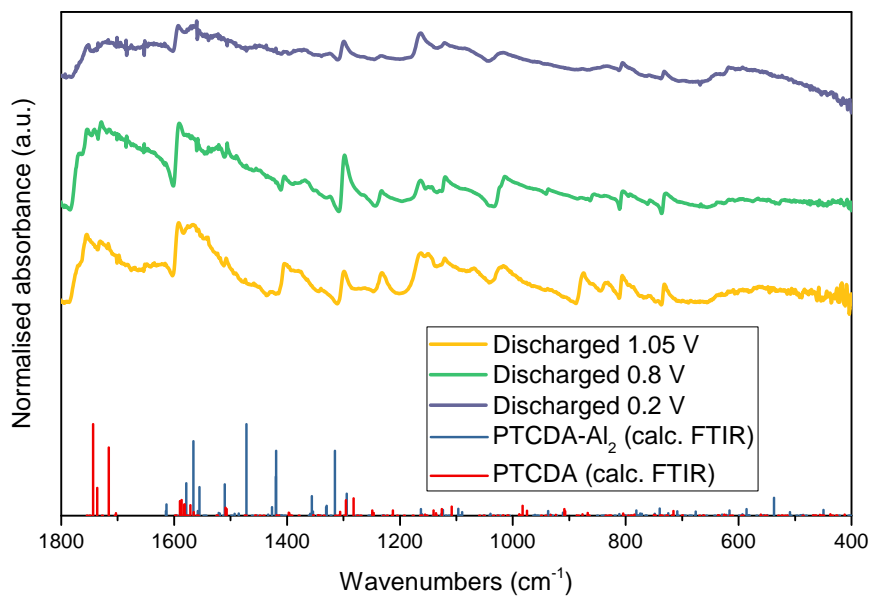

Figure S9: Predicted FT-IR spectra for PTCDA and PTCDA-Al<sub>2</sub>, compared with the experimental FT-IR spectra of the PTCDA cathode discharged at different voltages. Although some of the experimental peaks can be attributed to the pristine PTCDA material, the predicted spectrum for PTCDA-Al<sub>2</sub> shows poor agreement with the acquired data, thus further disproving the intercalation of Al<sup>3+</sup> as the redox mechanism.

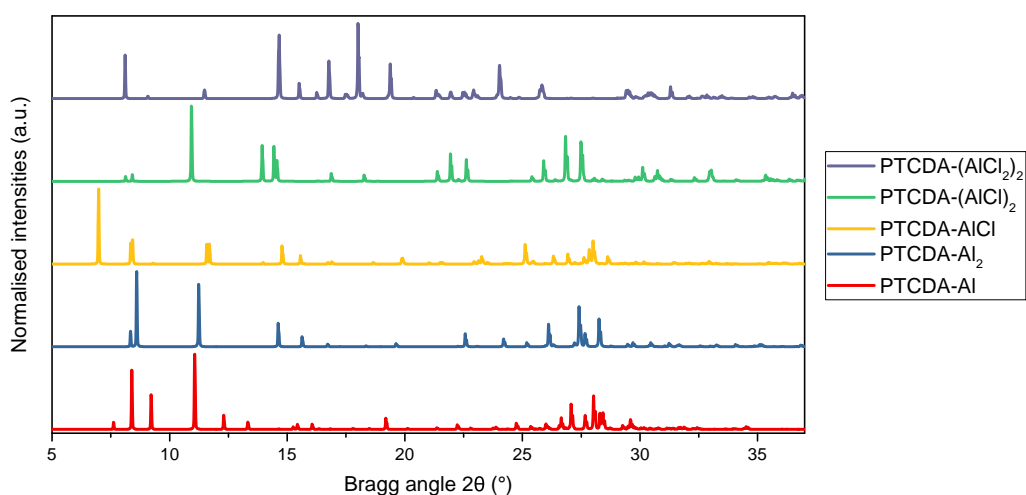

Figure S10: Predicted X-ray diffractograms for the intercalated PTCDA structures.

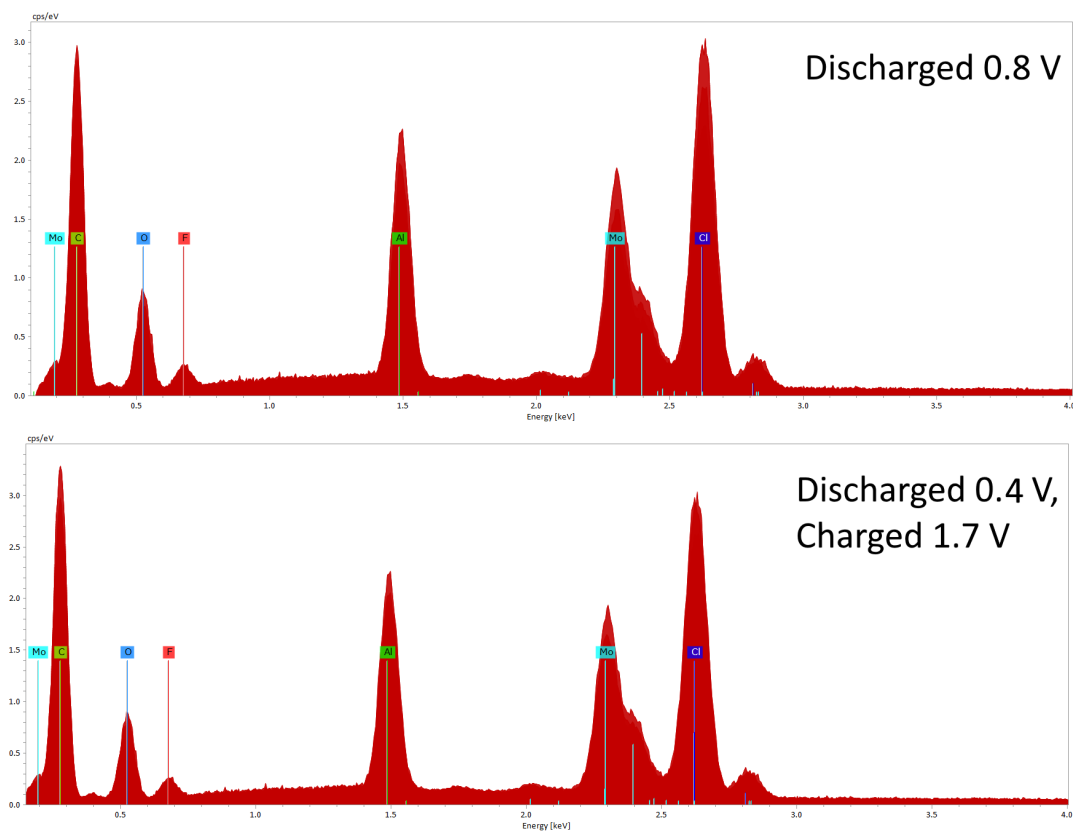

Figure S11: EDX spectra for partially discharged and discharged-charged PTCDA cathodes. the Mo and F peaks are relative to the metallic current collector and the fluorinated binder polymer, respectively.

| Sample                          | C:Al ratio | Al:Cl ratio |
|---------------------------------|------------|-------------|
| Discharged 0.8 V                | 35.3:1     | 1:2.08      |
| Discharged 0.4 V                | 27.3:1     | 1:1.58      |
| Discharged 0.4 V, Charged 1.7 V | 47.7:1     | 1:1.98      |

Table S1: EDX Atomic ratios of the cycled PTCDA cathodes. The C:Al ratio is consistent with a progressive increase of Al content in the cathode as discharge progresses, and a decrease upon re-charge. The Al:Cl ratio is consistent with the presence of residual chloroaluminate ions, resulting in a value larger than 1.

## References

- [1] K. Tojo and J. Mizuguchi, "Refinement of the crystal structure of -3,4:9,10-perylenetetracarboxylic dianhydride, C<sub>24</sub>H<sub>8</sub>O<sub>6</sub>, at 223 K," *Zeitschrift für Kristallographie - New Crystal Structures*, vol. 217, pp. 253–254, June 2002. Publisher: De Gruyter (O).
- [2] J. Contreras-García, E. R. Johnson, S. Keinan, R. Chaudret, J.-P. Piquemal, D. N. Beratan, and W. Yang, "NCI-PLOT: A Program for Plotting Noncovalent Interaction Regions," *Journal of Chemical Theory and Computation*, vol. 7, pp. 625–632, Mar. 2011. Publisher: American Chemical Society.
